# Supplementary material
Source: MDPI journal article supplement (https://www.mdpi.com/2071-1050/11/15/4045)
Supplement: s1 [file s1]

- Supplementary materials -

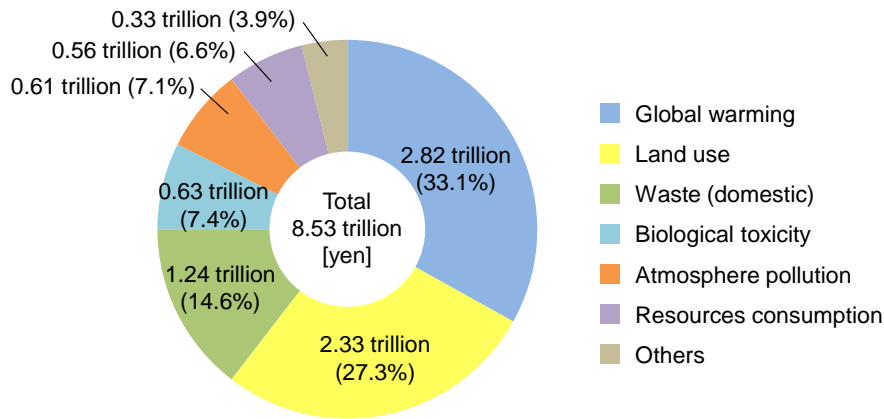

Figure S1. Total damage amounts for Japan by impact category (in JPY).

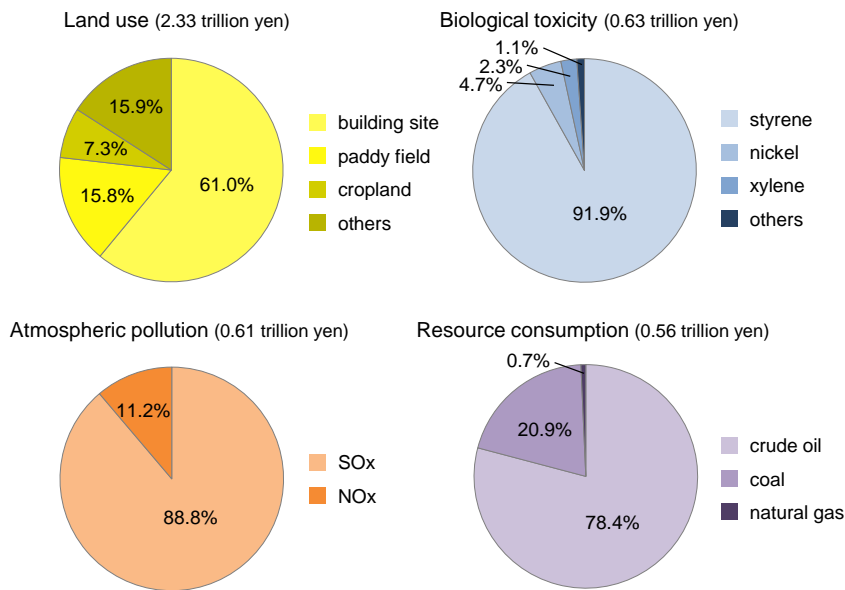

Figure S2. Breakdowns of inventory data for total damage amount by major impact categories (in JPY).

**Table S1.** Damage amounts per unit area and per capita (in JPY).

| Impact category         | Damage amount per unit area       |                                                 |                                 | Damage amount per capita |                                       |                                 |
|-------------------------|-----------------------------------|-------------------------------------------------|---------------------------------|--------------------------|---------------------------------------|---------------------------------|
|                         | Average<br>(yen/km <sup>2</sup> ) | Standard<br>deviation<br>(yen/km <sup>2</sup> ) | Variation<br>coefficient<br>(-) | Average<br>(yen/capita)  | Standard<br>deviation<br>(yen/capita) | Variation<br>coefficient<br>(-) |
| Ozone layer destruction | 1.41×10 <sup>5</sup>              | 3.92×10 <sup>6</sup>                            | 27.91                           | 9.24×10 <sup>1</sup>     | 2.29×10 <sup>3</sup>                  | 24.78                           |
| Photochemical ozone     | 2.29×10 <sup>5</sup>              | 1.90×10 <sup>6</sup>                            | 8.28                            | 3.19×10 <sup>2</sup>     | 2.91×10 <sup>3</sup>                  | 9.12                            |
| Human toxicity          | 4.29×10 <sup>5</sup>              | 4.68×10 <sup>6</sup>                            | 10.91                           | 2.90×10 <sup>2</sup>     | 2.52×10 <sup>3</sup>                  | 8.70                            |
| Biological toxicity     | 6.75×10 <sup>6</sup>              | 4.01×10 <sup>7</sup>                            | 5.94                            | 6.08×10 <sup>3</sup>     | 5.72×10 <sup>4</sup>                  | 9.41                            |
| Eutrophication          | 1.51×10 <sup>-1</sup>             | 3.21×10 <sup>0</sup>                            | 21.23                           | 2.19×10 <sup>-4</sup>    | 5.45×10 <sup>-3</sup>                 | 24.81                           |
| Global warming          | 2.07×10 <sup>7</sup>              | 5.37×10 <sup>7</sup>                            | 2.59                            | 2.57×10 <sup>4</sup>     | 3.41×10 <sup>4</sup>                  | 1.33                            |
| Land use                | 1.45×10 <sup>7</sup>              | 1.46×10 <sup>7</sup>                            | 1.01                            | 4.67×10 <sup>4</sup>     | 5.87×10 <sup>4</sup>                  | 1.26                            |
| Resource consumption    | 3.91×10 <sup>6</sup>              | 1.12×10 <sup>7</sup>                            | 2.86                            | 4.11×10 <sup>3</sup>     | 1.12×10 <sup>4</sup>                  | 2.72                            |
| Acidification           | 4.31×10 <sup>5</sup>              | 9.84×10 <sup>5</sup>                            | 2.28                            | 7.51×10 <sup>2</sup>     | 7.83×10 <sup>2</sup>                  | 1.04                            |
| Atmospheric pollution   | 6.59×10 <sup>6</sup>              | 2.24×10 <sup>7</sup>                            | 3.40                            | 5.29×10 <sup>3</sup>     | 7.09×10 <sup>3</sup>                  | 1.34                            |
| Domestic waste          | 7.82×10 <sup>6</sup>              | 1.54×10 <sup>7</sup>                            | 1.97                            | 9.61×10 <sup>3</sup>     | 3.50×10 <sup>3</sup>                  | 0.36                            |
| Road traffic noise      | 1.19×10 <sup>6</sup>              | 1.71×10 <sup>6</sup>                            | 1.44                            | 3.90×10 <sup>3</sup>     | 4.29×10 <sup>3</sup>                  | 1.10                            |
| Total                   | 7.42×10 <sup>7</sup>              | 1.79×10 <sup>8</sup>                            | 2.41                            | 1.02×10 <sup>5</sup>     | 2.14×10 <sup>5</sup>                  | 2.10                            |

Note: Number of municipalities: 1741. The variation coefficient is calculated by dividing the standard deviation by the average, and it shows the relative variation in the data.

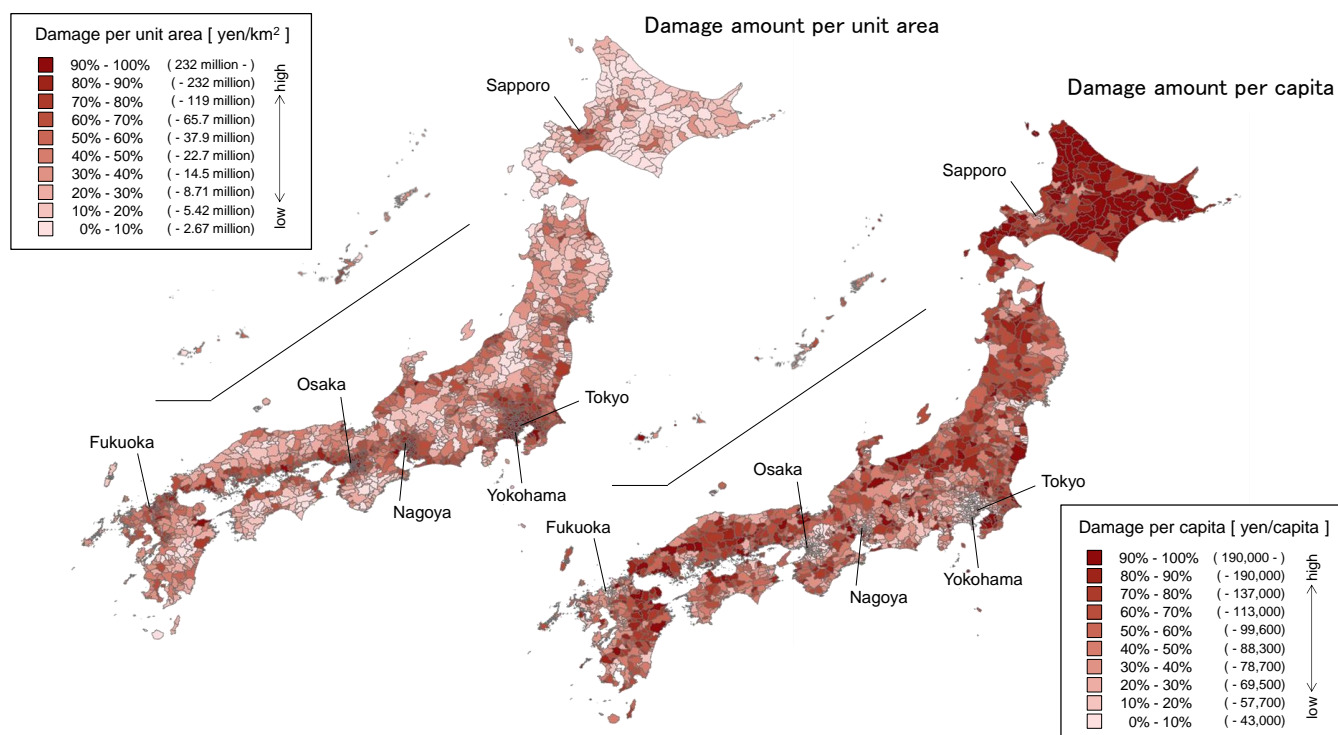

**Figure S3.** Spatially explicit total damage amount in Japanese municipalities (in JPY)  
(left map, damage amount per unit area; right map, damage amount per capita).

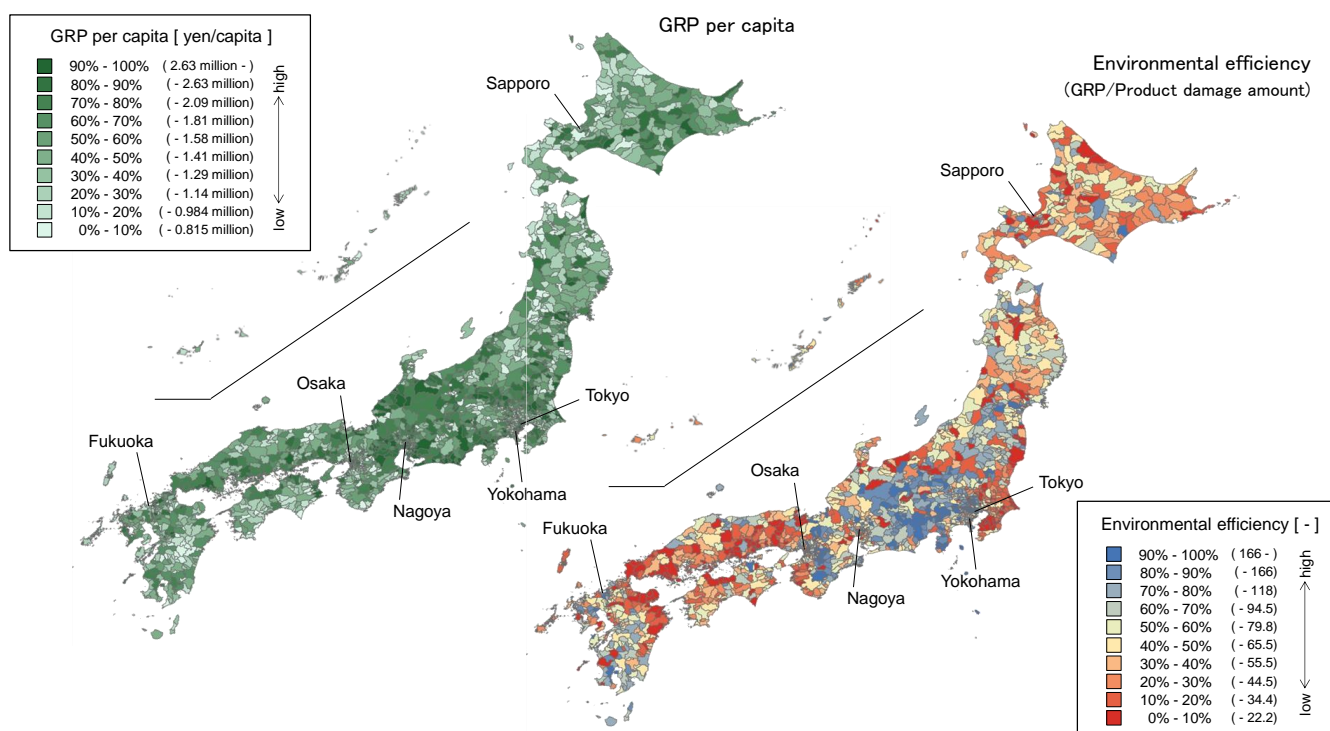

**Figure S4.** Gross regional product (GRP) per capita and environmental efficiency for Japanese municipalities (in JPY)  
(left map, GRP per capita; right map, environmental efficiency).

**Table S2.** Assessment results for 21 major municipalities in Japan (in JPY).

| Municipality         | GRP per capita<br>(yen/capita) |         | Production damage<br>amount per capita<br>(yen/capita) |         | Environmental<br>Efficiency (-) |         |
|----------------------|--------------------------------|---------|--------------------------------------------------------|---------|---------------------------------|---------|
| Sapporo              | 2.00×10 <sup>6</sup>           | (78.8%) | 2.98×10 <sup>4</sup>                                   | (65.6%) | 67.2                            | (53.1%) |
| Sendai               | 2.96×10 <sup>6</sup>           | (94.8%) | 2.07×10 <sup>4</sup>                                   | (47.8%) | 143.1                           | (89.1%) |
| Saitama              | 2.16×10 <sup>6</sup>           | (83.8%) | 6.60×10 <sup>3</sup>                                   | (4.8%)  | 327.0                           | (99.3%) |
| Chiba                | 2.39×10 <sup>6</sup>           | (89.1%) | 5.83×10 <sup>4</sup>                                   | (84.9%) | 41.1                            | (27.4%) |
| Tokyo (special ward) | 5.88×10 <sup>6</sup>           | (99.1%) | 1.65×10 <sup>4</sup>                                   | (38.5%) | 355.0                           | (99.6%) |
| Yokohama             | 2.14×10 <sup>6</sup>           | (83.2%) | 2.45×10 <sup>4</sup>                                   | (56.9%) | 87.3                            | (68.0%) |
| Kawasaki             | 1.89×10 <sup>6</sup>           | (75.0%) | 4.86×10 <sup>4</sup>                                   | (80.5%) | 38.9                            | (25.2%) |
| Sagamihara           | 1.52×10 <sup>6</sup>           | (57.2%) | 1.55×10 <sup>4</sup>                                   | (34.3%) | 98.0                            | (74.7%) |
| Niigata              | 2.07×10 <sup>6</sup>           | (81.2%) | 2.29×10 <sup>4</sup>                                   | (53.3%) | 90.5                            | (70.4%) |
| Shizuoka             | 2.49×10 <sup>6</sup>           | (90.4%) | 1.16×10 <sup>4</sup>                                   | (21.9%) | 214.8                           | (96.6%) |
| Hamamatsu            | 2.32×10 <sup>6</sup>           | (87.4%) | 1.27×10 <sup>4</sup>                                   | (25.8%) | 182.2                           | (94.1%) |
| Nagoya               | 3.58×10 <sup>6</sup>           | (97.0%) | 3.77×10 <sup>4</sup>                                   | (73.5%) | 95.0                            | (72.8%) |
| Kyoto                | 2.22×10 <sup>6</sup>           | (85.5%) | 2.95×10 <sup>4</sup>                                   | (65.3%) | 75.3                            | (59.0%) |
| Osaka                | 5.14×10 <sup>6</sup>           | (98.7%) | 5.63×10 <sup>4</sup>                                   | (84.0%) | 91.4                            | (71.0%) |
| Sakai                | 1.80×10 <sup>6</sup>           | (71.4%) | 2.99×10 <sup>4</sup>                                   | (65.7%) | 60.4                            | (45.5%) |
| Kobe                 | 2.39×10 <sup>6</sup>           | (89.1%) | 2.17×10 <sup>4</sup>                                   | (49.9%) | 110.6                           | (80.7%) |
| Okayama              | 2.17×10 <sup>6</sup>           | (83.9%) | 3.38×10 <sup>4</sup>                                   | (70.0%) | 64.0                            | (49.3%) |
| Hiroshima            | 2.52×10 <sup>6</sup>           | (90.9%) | 3.48×10 <sup>4</sup>                                   | (71.2%) | 72.4                            | (57.0%) |
| Kitakyushu           | 2.03×10 <sup>6</sup>           | (79.5%) | 4.93×10 <sup>4</sup>                                   | (80.9%) | 41.1                            | (27.4%) |
| Fukuoka              | 2.99×10 <sup>6</sup>           | (94.9%) | 9.45×10 <sup>3</sup>                                   | (12.8%) | 316.9                           | (99.2%) |
| Kumamoto             | 1.75×10 <sup>6</sup>           | (68.9%) | 2.11×10 <sup>4</sup>                                   | (48.6%) | 82.9                            | (64.9%) |

Note: Cumulative relative frequency based on all municipalities is shown in parentheses.

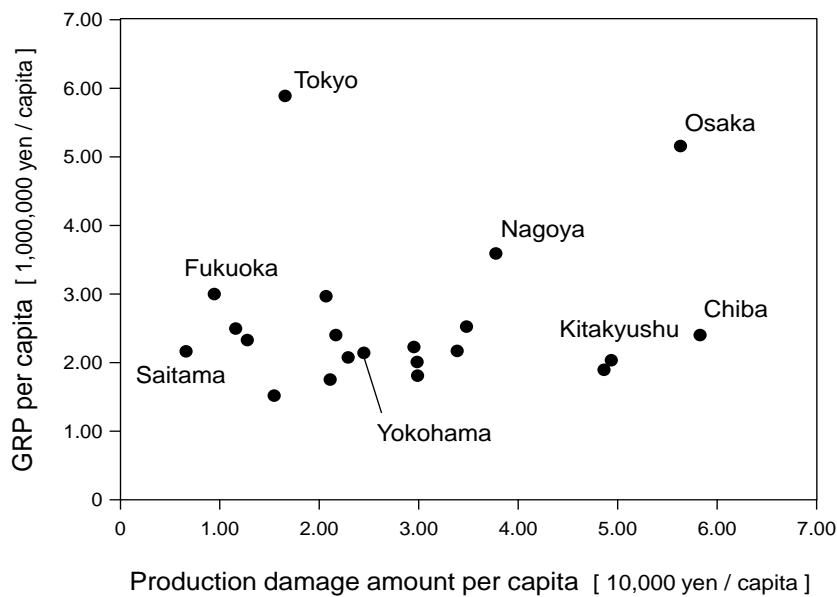**Figure S5.** Assessment results for 21 major municipalities in Japan (in JPY).
